# Supplementary material for: The influence of the size of aromatic monomers on the structure and catalytic activity of polymer solid acids
Source: Royal Society of Chemistry journal article supplement (doi:10.1039/d1nj02596a), 2021-11-23
Supplement: d1nj02596a1.pdf [file d1nj02596a1.pdf]

## Supplement Information

### **The influence of the size of aromatic monomers on the structure and catalytic activity of polymer solid acids**

Cui Wang,<sup>#a</sup> Shuguang Shen,<sup>#a\*</sup> Yehui Li,<sup>a</sup> Huajie Pan,<sup>a</sup> Zijian Zhou,<sup>a</sup> Jing Li,<sup>b</sup> Bin

Wu,<sup>a</sup> Shuaiqi Jing,<sup>a</sup> Chenyuan Guo,<sup>a</sup> Jimin Fan,<sup>a</sup> Hongsheng Guo<sup>a</sup>

<sup>#</sup> The two authors contributed equally to this work and should be considered co-first authors.

<sup>a</sup> College of Chemistry and Chemical Engineering, Taiyuan University of Technology, Taiyuan, 030024, People's Republic of China

<sup>b</sup> College of Biomedical Engineering, Taiyuan University of Technology, Taiyuan, 030024, People's Republic of China

\* Corresponding Author: Mr. Shuguang Shen

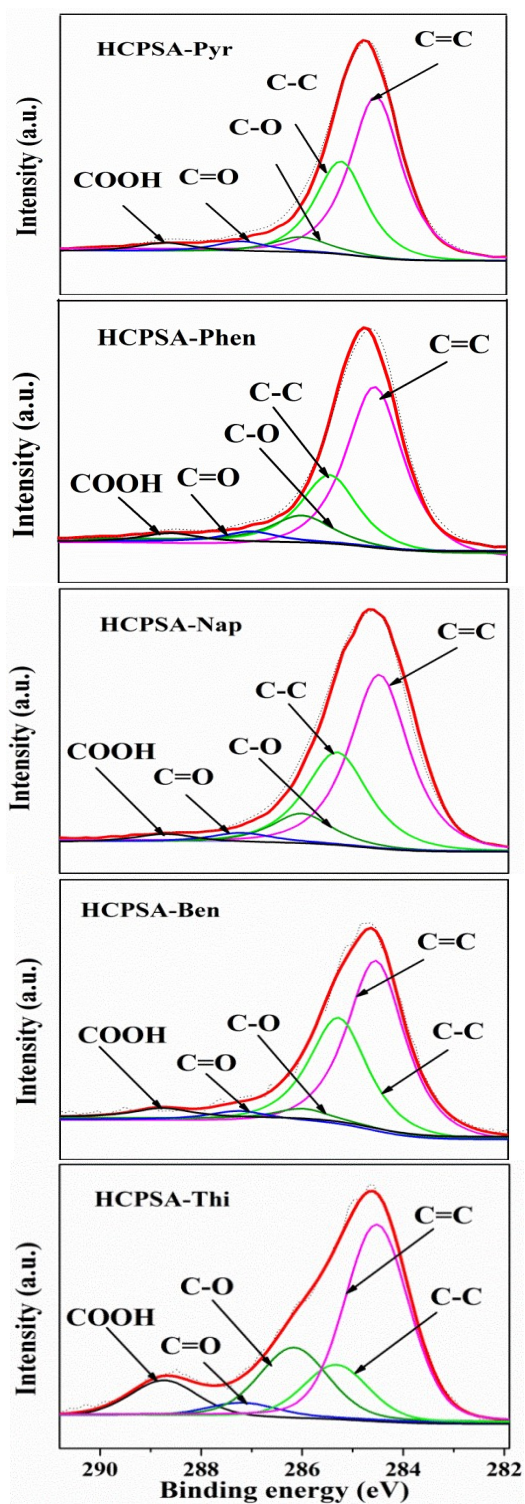

Fig. S1. C 1s patterns of HCPSAs

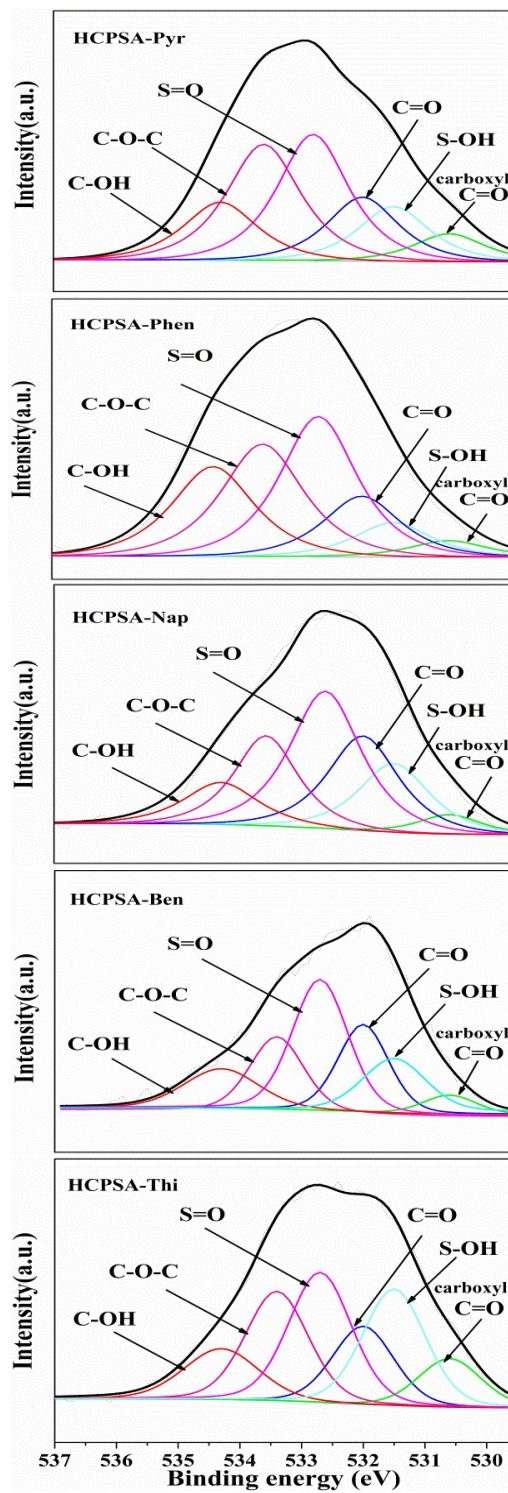

Fig. S2. O 1s patterns of HCPSAs

**Table S1. The percentage of different types of carbon in carbon atoms and the percentage of carbon atoms in total atoms**

| Catalysts  | C (At.%)          |       |       |      |       | Carbon atom/ Total atom (At.%) |
|------------|-------------------|-------|-------|------|-------|--------------------------------|
|            | sp <sup>2</sup> C | C-C   | C-O   | C=O  | -COOH |                                |
| HCPSA-Pyr  | 64.82             | 24.07 | 7.55  | 2.67 | 0.89  | 84.22                          |
| HCPSA-Phen | 59.72             | 27.08 | 8.83  | 2.51 | 1.86  | 82.32                          |
| HCPSA-Nap  | 56.39             | 31.12 | 8.05  | 2.81 | 1.63  | 80.50                          |
| HCPSA-Ben  | 53.52             | 36.58 | 5.88  | 2.57 | 1.45  | 79.45                          |
| HCPSA-Thi  | 51.95             | 18.09 | 21.84 | 3.78 | 4.34  | 76.71                          |

**Table S2. Percentage of different types of oxygen in oxygen atoms and the percentage of oxygen atoms in total atoms**

| Catalysts  | O (At.%) |       |       |       |       |       | Oxygen atom/ Total atom (At.%) |
|------------|----------|-------|-------|-------|-------|-------|--------------------------------|
|            | C-OH     | C-O-C | S=O   | C=O   | S-OH  | -COOH |                                |
| HCPSA-Pyr  | 31.79    | 38.91 | 12.57 | 6.18  | 8.74  | 1.81  | 14.88                          |
| HCPSA-Phen | 24.18    | 30.28 | 17.41 | 15.32 | 8.68  | 4.13  | 16.71                          |
| HCPSA-Nap  | 20.94    | 15.08 | 25.44 | 24.84 | 11.18 | 2.52  | 18.24                          |
| HCPSA-Ben  | 16.10    | 6.25  | 29.34 | 23.41 | 23.15 | 1.75  | 18.88                          |
| HCPSA-Thi  | 11.60    | 29.23 | 14.25 | 25.53 | 8.32  | 11.07 | 19.23                          |
